# Supplementary material
Source: ML conference proceedings conference paper supplement (https://proceedings.mlr.press/v97/ren19b.html)
Supplement: Supplementary file [file ren19b-supp.pdf]

## 8. Proofs

### 8.1. Proof of Theorem 1

**Theorem 1** [No Free Lunch] Let  $x \in \mathcal{X}$  where  $\mathcal{X}$  is a finite set. Let  $p(x)$  be a uniform distribution on  $\mathcal{X}$ . Let  $q$  be any antithetic distribution  $q(x_1, x_2)$ . Let  $\mathcal{F}$  be the set of functions  $\mathcal{X} \rightarrow \mathbb{R}$  such that  $\text{Var}_{p(x_1)p(x_2)}[\hat{\mu}_f(x_{1:2})] \neq 0$ . Then

$$\max_{f \in \mathcal{F}} \frac{\text{Var}_{q(x_1, x_2)}[\hat{\mu}_f(x_{1:2})]}{\text{Var}_{p(x_1)p(x_2)}[\hat{\mu}_f(x_{1:2})]} \geq 1 - \frac{1}{|\mathcal{X}| - 1} \quad (22)$$

For sampling without replacement for any  $f \in \mathcal{F}$

$$\frac{\text{Var}_{q(x_1, x_2)}[\hat{\mu}_f(x_{1:2})]}{\text{Var}_{p(x_1)p(x_2)}[\hat{\mu}_f(x_{1:2})]} = 1 - \frac{1}{|\mathcal{X}| - 1} \quad (23)$$

*Proof of Theorem 1.* First we show that

$$\begin{aligned} & \text{Var}_{q(x_1, x_2)}[\hat{\mu}_f(x_{1:2})] \\ &= \frac{1}{4} (\text{Var}_{q(x_1, x_2)}[f(x_1)] + \text{Var}_{q(x_1, x_2)}[f(x_2)] + \\ & \quad 2\text{Cov}_{q(x_1, x_2)}(f(x_1), f(x_2))) \\ &= \frac{1}{2} \text{Var}_{p(x)}[f(x)] + \frac{1}{2} \text{Cov}_{q(x_1, x_2)}(f(x_1), f(x_2)) \end{aligned}$$

In addition

$$\text{Var}_{p(x_1)p(x_2)}[\hat{\mu}_f(x_{1:2})] = \frac{1}{2} \text{Var}_{p(x)}[f(x)]$$

So

$$\frac{\text{Var}_{q(x_1, x_2)}[\hat{\mu}_f(x_{1:2})]}{\text{Var}_{p(x_1)p(x_2)}[\hat{\mu}_f(x_{1:2})]} = 1 + \frac{\text{Cov}_{q(x_1, x_2)}(f(x_1), f(x_2))}{\text{Var}_{p(x)}[f(x)]}$$

Denote  $|\mathcal{X}|$  by  $k$ , and the elements of  $\mathcal{X}$  by  $v_1, v_2, \dots, v_k$ . We only have to show

$$\max_{f \in \mathcal{F}} \frac{\text{Cov}_{q(x_1, x_2)}(f(x_1), f(x_2))}{\text{Var}_{p(x)}[f(x)]} \geq -\frac{1}{k-1} \quad (24)$$

which is equivalent to Eq.(23).

Let  $\mathcal{X} = \{v_1, \dots, v_k\}$  be the set of  $k$  values  $x$  can take. Denote

$$Q = \begin{pmatrix} q(v_1, v_1) & q(v_1, v_2) & \cdots & q(v_1, v_k) \\ q(v_2, v_1) & q(v_2, v_2) & \cdots & q(v_2, v_k) \\ \cdots & \cdots & \cdots & \cdots \\ q(v_k, v_1) & q(v_k, v_2) & \cdots & q(v_k, v_k) \end{pmatrix}$$

Because  $q(x_1, x_2)$  is an antithetic distribution for the uniform distribution  $p(x)$ , it must satisfy

$$\mathbf{1}^T Q = \frac{1}{k} \mathbf{1} \quad Q \mathbf{1} = \frac{1}{k} \mathbf{1}$$

Denote

$$f = (f(v_1), f(v_2), \dots, f(v_k))^T$$

Then because the marginal is uniform  $p(v_1) = \dots = p(v_k) = 1/k$

$$\begin{aligned} & \text{Cov}_{q(x_1, x_2)}[f(x_1), f(x_2)] \\ &= \sum_{v_1, v_2 \in \mathcal{X}} f(v_1)f(v_2)(q(v_1, v_2) - p(v_1)p(v_2)) \\ &= f^T (Q - \frac{1}{k^2} \mathbf{1}\mathbf{1}^T) f \\ &= f^T \left( \frac{Q + Q^T}{2} - \frac{1}{k^2} \mathbf{1}\mathbf{1}^T \right) f \end{aligned}$$

where the last step is because

$$f^T Q f = (f^T Q f)^T = f^T Q^T f = f^T \frac{Q + Q^T}{2} f$$

Therefore for each non-symmetric  $Q$ , there is a symmetric joint distribution  $\frac{Q+Q^T}{2}$  that achieves the same covariance. For the rest of this proof we assume that  $Q$  is symmetric without loss of generality. We will use the notation

$$R \stackrel{\text{def}}{=} Q - \frac{1}{k^2} \mathbf{1}\mathbf{1}^T$$

$R$  is a symmetric matrix

We also have

$$\begin{aligned} \text{Var}_{p(x_1)p(x_2)}[f(x)] &= \frac{1}{k} \sum_{x \in \mathcal{X}} f(x)^2 - \frac{1}{k^2} \sum_{x_1, x_2} f(x_1)f(x_2) \\ &= \frac{1}{k} f^T f - \frac{1}{k^2} f^T \mathbf{1}\mathbf{1}^T f \\ &= f^T \left( \frac{1}{k} I - \frac{1}{k^2} \mathbf{1}\mathbf{1}^T \right) f \end{aligned}$$

We will use the notation

$$R' \stackrel{\text{def}}{=} \frac{1}{k} I - \frac{1}{k^2} \mathbf{1}\mathbf{1}^T$$

To briefly summarize our notation we have

$$\begin{aligned} \text{Cov}_{q(x_1, x_2)}[f(x_1), f(x_2)] &= f^T R f \\ \text{Var}_{p(x)}[f(x)] &= f^T R' f \end{aligned}$$

Now we try to find for any  $R$ , some  $f$  such that  $f^T R f / f^T R' f$  is large. In other words, we want to prove

$$\max_{f \in \mathcal{F}} \frac{f^T R f}{f^T R' f} \geq -\frac{1}{k-1} \quad (25)$$

which is equivalent to Eq.(24). As is the condition of the theorem, we require  $f \in \mathcal{F}$  to satisfy  $f^T R' f \neq 0$ .

For any such matrix  $R$ ,  $\mathbf{1}$  must be an eigenvector with eigenvalue 0. This is because by our definition

$$R\mathbf{1} = Q\mathbf{1} - \frac{1}{k^2}\mathbf{1}\mathbf{1}^T\mathbf{1} = \frac{1}{k}\mathbf{1} - \frac{1}{k}\mathbf{1} = 0$$

In addition,  $\mathbf{1}$  is also an eigenvector of  $R'$  with eigenvalue 0 because

$$R'\mathbf{1} = \frac{1}{k}\mathbf{1} - \frac{1}{k}\mathbf{1} = 0$$

For any  $f$  that is not a scalar multiple of  $\mathbf{1}$ ,  $f^T R' f > 0$ . This is because

$$\text{rank}(R') \geq \text{rank}(I) - \text{rank}(\mathbf{1}\mathbf{1}^T) \geq k - 1$$

so  $\mathbf{1}$  (or its scalar multiple) must be the only eigenvector with 0 as its eigenvalue. In addition  $f^T R' f \geq 0$  because it is a variance.

This also implies that  $f \in \mathcal{F}$ , if and only if  $f^T R' f \neq 0$ , if and only if  $f$  is not a scalar multiple of  $\mathbf{1}$ .

We consider two situations

1)  $R$  has at least one positive eigenvalue. Let  $f$  be the corresponding eigenvector, we have

$$f^T R f > 0 \quad f^T R' f > 0$$

and certainly  $f$  is not a scalar multiple of  $\mathbf{1}$ , which means that Eq.(25) must be true.

2)  $R$  does not have any positive eigenvalues. Because  $Q$  is a matrix with no negative entries,  $\text{tr}(Q) \geq 0$ . In addition  $\text{tr}(\frac{1}{k^2}\mathbf{1}\mathbf{1}^T) = \frac{1}{k}$ , so

$$\text{tr}(R) = \text{tr}(Q) - \text{tr}(\frac{1}{k^2}\mathbf{1}\mathbf{1}^T) \geq -\frac{1}{k} \quad (26)$$

We know that  $R$  must have a zero eigenvalue, and all other eigenvalues are non-positive. We arrange them in non-ascending order

$$0 \geq \lambda_2 \geq \lambda_3 \geq \dots \geq \lambda_k$$

It is easy to see that  $\lambda_2 \geq -\frac{1}{k(k-1)}$  because otherwise

$$\text{tr}(R) = \sum_i \lambda_i < -\frac{1}{k(k-1)}(k-1) < -\frac{1}{k}$$

which violates Eq.(26). Suppose the eigenvector corresponding to  $\lambda_2$  is  $g$ . Because  $R$  is symmetric, we can always select  $g$  orthogonal to the other eigenvectors. In particular,  $g^T \mathbf{1} = 0$ . The  $f$  we will choose is  $f_{\text{bad}} = g - \mathbf{1}$ . We know that  $f_{\text{bad}} \in \mathcal{F}$  as it is not a scalar multiple of  $\mathbf{1}$ . For  $f_{\text{bad}}$ , we have

$$\begin{aligned} f_{\text{bad}}^T R f_{\text{bad}} &= (g - \mathbf{1})^T R (g - \mathbf{1}) \\ &= g^T R g \geq -\frac{1}{k(k-1)} g^T g \end{aligned}$$

where the above inequalities come from the fact that  $R\mathbf{1} = \mathbf{1}^T R = 0$ , and  $g^T \mathbf{1} = 0$ .

Similarly we have

$$\begin{aligned} f_{\text{bad}}^T R' f_{\text{bad}} &= (g - \mathbf{1})^T R' (g - \mathbf{1}) \\ &= \frac{1}{k}(g - \mathbf{1})^T (g - \mathbf{1}) - \frac{1}{k^2}(g - \mathbf{1})^T \mathbf{1}\mathbf{1}^T (g - \mathbf{1}) \\ &= \frac{1}{k}(g^T g + k) - \frac{1}{k^2}k^2 = \frac{1}{k}g^T g \end{aligned}$$

This means that for this choice of  $f_{\text{bad}} = g - \mathbf{1}$

$$\frac{f_{\text{bad}}^T R f_{\text{bad}}}{f_{\text{bad}}^T R' f_{\text{bad}}} \geq -\frac{1}{k-1}$$

which proves Eq.(25).

Finally we show that sampling without replacement achieves equality. For sampling without replacement

$$\begin{aligned} Q &= \begin{pmatrix} 0 & \frac{1}{k(k-1)} & & \frac{1}{k(k-1)} \\ \frac{1}{k(k-1)} & 0 & & \frac{1}{k(k-1)} \\ & & \dots & \\ \frac{1}{k(k-1)} & \frac{1}{k(k-1)} & & 0 \end{pmatrix} \\ &= \frac{1}{k(k-1)}(\mathbf{1}\mathbf{1}^T - I) \end{aligned}$$

Then

$$R = Q - \frac{1}{k^2}\mathbf{1}\mathbf{1}^T = \frac{1}{k^2(k-1)}\mathbf{1}\mathbf{1}^T - \frac{1}{k(k-1)}I$$

Note that the set of eigenvalues for  $\mathbf{1}\mathbf{1}^T$  is

$$k, 0, \dots, 0$$

so the eigenvalues for  $R$  must be

$$0, -\frac{1}{k(k-1)}, \dots, -\frac{1}{k(k-1)}$$

Denote this eigen-decomposition as  $R = H^T \Lambda H$ . As before let  $R' = \frac{1}{k}I - \frac{1}{k^2}\mathbf{1}\mathbf{1}^T$ . Because  $R'$  is a scalar multiple of  $R$ ,  $R'$  must have the same eigenvectors as  $R$ , with eigenvalues

$$0, \frac{1}{k}, \dots, \frac{1}{k}$$

Denote the eigen-decomposition as  $R' = H^T \Lambda' H$ . Choose any  $f$ , we compute  $g = Hf$ . If  $g = (*, 0, \dots, 0)$  ( $*$  denotes any real number) we will have  $f^T R' f = g^T \Lambda' g = 0$  and our theorem excludes this degenerate situation. When  $g \neq (*, 0, \dots, 0)$ , we have

$$\begin{aligned} \frac{\text{Cov}_{q(x_1, x_2)}(f(x_1), f(x_2))}{\text{Var}_{p(x)}[f(x)]} &= \frac{f^T R f}{f^T R' f} \\ &= \frac{g^T \Lambda g}{g^T \Lambda' g} = -\frac{1}{k-1} \end{aligned}$$

This means that sampling without replacement achieves our theoretical upper bound on minimax performance.  $\square$

## 8.2. Proof of Proposition 1

**Proposition 1** Let  $q_\theta(\mathbf{x}_{1:m})$  be a Gaussian-reparameterized antithetic of order  $m$  for  $p(\mathbf{x})$ . Then for any  $k$ :

1. For any  $\Sigma_\theta \in \Sigma_{\text{unbiased}}$ , the estimator (10) is unbiased

$$\mathbb{E}_{q_\theta(\mathbf{x}_{1:m})}[\hat{\mu}_f(\mathbf{x}_{1:m})] = \mathbb{E}_{p(\mathbf{x})}[f(\mathbf{x})]$$

2. If  $\Sigma_\theta = I$ , the Gaussian-reparameterized antithetic is equivalent to i.i.d sampling.
3. Given a Cholesky decomposition  $\Sigma_\theta = L_\theta L_\theta^T$ , we can sample from  $q_\theta(\mathbf{x}_{1:m})$  by drawing  $m$  i.i.d. samples  $\delta = (\delta_1, \dots, \delta_m)^T$  from  $\mathcal{N}(0, I_d)$ , and  $\mathbf{x}_{1:m} = L_\theta \delta$ .

*Proof of Proposition 1.* Part 1: Because  $\Sigma_\theta \in \Sigma_{\text{unbiased}}$ , each component  $\epsilon_i$  of  $(\epsilon_1, \dots, \epsilon_m) \sim \mathcal{N}(0, \Sigma_\theta)$  is marginally  $\epsilon_i \sim \mathcal{N}(0, I_d)$ . By assumption, this means that  $g(\epsilon_i) \sim p(x)$ . Combined with Eq. (3) this finishes the proof.

Part 2: By construction, if  $\Sigma_\theta = I$  then  $(\epsilon_1, \dots, \epsilon_m) \sim \mathcal{N}(0, \Sigma_\theta)$  are i.i.d. Thus  $g(\epsilon_i)$  are also i.i.d.

Part 3: Given a Cholesky decomposition  $\Sigma_\theta = L_\theta L_\theta^T$ , we can sample  $(\epsilon_1, \dots, \epsilon_m)$  via  $(\epsilon_1, \dots, \epsilon_m) = L_\theta(\mathbf{z}_1, \dots, \mathbf{z}_m)$  where  $(\mathbf{z}_1, \dots, \mathbf{z}_m) \stackrel{\text{i.i.d.}}{\sim} \mathcal{N}(0, I_d)$ .  $\square$

## 8.3. Proof of Theorem 2

**Theorem 2** For any  $\epsilon > 0$ , the map  $\psi$  defined in Eq.(13) is a surjection from  $\mathbb{M}^{m \times m}$  into  $\Sigma_{\text{unbiased}}$ .

*Proof of Theorem 2.* We first check that  $\psi$  is well defined.

For any  $\theta \in \mathbb{M}^{m \times m}$ , denote  $\tilde{\Sigma} = \epsilon I + \theta \theta^T \in \mathbb{M}^{m \times m}$ . When  $\epsilon > 0$ , this must be positive definite as a matrix in  $\mathbb{R}^{md \times md}$ . Because  $\tilde{\Sigma}$  is positive definite as a matrix  $\mathbb{R}^{md \times md}$ , each element of  $\text{diag}(\tilde{\Sigma})$  as a matrix  $\mathbb{M}$  must be a positive definite element of  $\mathbb{M}$ , and must have an inverse. This means that  $\text{diag}(\tilde{\Sigma})^{-1/2}$  is also well defined. Therefore  $\psi(\theta)$  is well defined.

It is obvious that  $\psi(\theta)$  has identity diagonal. It is also positive semi-definite, so  $\psi(\theta) \in \Sigma_{\text{unbiased}}$ .

Now we prove that the map is a surjection. Choose any  $\Sigma \in \Sigma_{\text{unbiased}}$ , let

$$\zeta(\Sigma) = \text{diag}(\Sigma)^{-1/2} \Sigma \text{diag}(\Sigma)^{-T/2}$$

then it is easy to see that  $\zeta(\Sigma) = \Sigma$ . In addition, for any diagonal matrix  $D \in \mathbb{M}^{m \times m}$  whose diagonal elements are all positive definite elements of  $\mathbb{M}$ , we have  $\zeta(D \Sigma D^T) = \Sigma$ . We choose  $D = \alpha I$ , where  $\alpha \in \mathbb{R}_{>0}$ ;  $I$  is the identity matrix of  $\mathbb{M}^{m \times m}$ . We choose a sufficiently large  $\alpha$

such that  $\alpha^2 \Sigma - \epsilon I$  is positive definite element of  $\mathbb{R}^{md \times md}$ . By the cholesky decomposition in  $\mathbb{R}^{md \times md}$ , there exists  $\theta \in \mathbb{R}^{md \times md}$  such that  $\theta \theta^T = \alpha^2 \Sigma - \epsilon I$ . We have, by construction, found a  $\theta$  that satisfy  $\psi(\theta) = \Sigma$ . This is because  $\epsilon I + \theta \theta^T = \alpha^2 \Sigma = \alpha \Sigma \alpha$ , so  $\zeta(\epsilon I + \theta \theta^T) = \Sigma$ .  $\square$

## 9. Results of IWAE

|                   | MNIST         |              | Omniglot      |               |
|-------------------|---------------|--------------|---------------|---------------|
| noise dimension   | 5             | 10           | 5             | 10            |
| i.i.d sampling    | 113.79        | 98.92        | 142.50        | 130.65        |
| negative sampling | 113.71        | 98.89        | 142.35        | 130.37        |
| Our method        | <b>113.61</b> | <b>98.71</b> | <b>142.15</b> | <b>130.23</b> |

Table 1: Negative Log Likelihood of our methods compared with negative sampling and i.i.d sampling on MNIST and Omniglot dataset. Our method can achieve a tighter bound on all settings.

## 10. Results of GANs

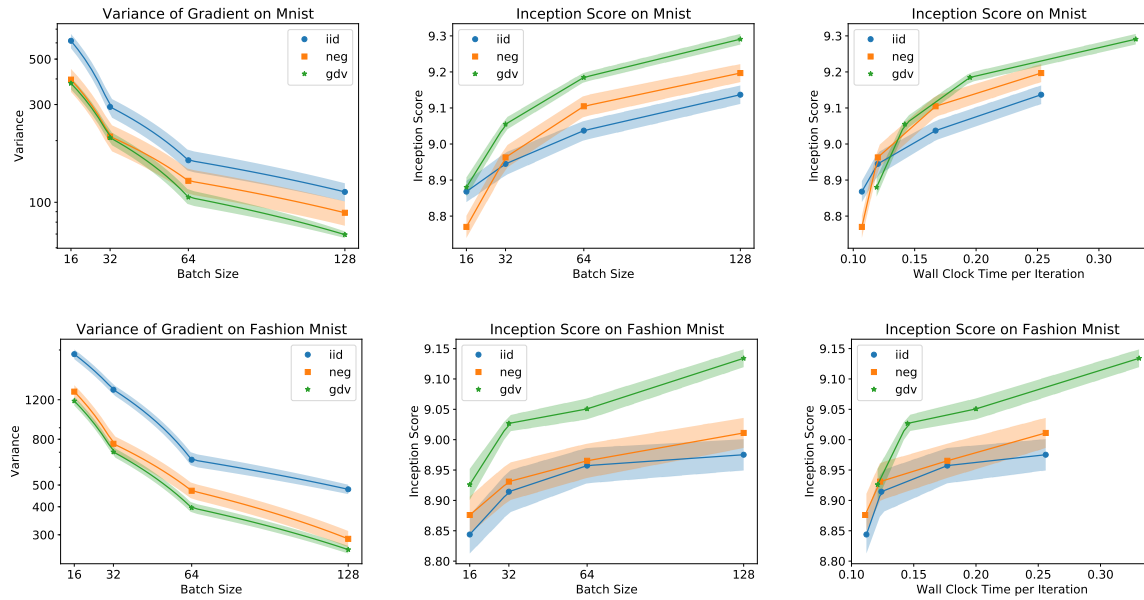

Figure 3: Variance reduction for GAN training. **Left:** Variance of gradient estimation for different batch sizes. **Middle:** Inception score after 50 epochs of training for different mini-batch batch sizes  $m$ . **Right:** Inception score by wall-clock time. For small batch size  $m$ , adaptive antithetic improves marginally compared to baselines; because of its overhead, the overall wall-clock time is worse; for larger batch size  $m$ , adaptive antithetic performs significantly better, the overall wall-clock time is also better.
